# Supplementary material for: Stimuli-responsive self-assembling peptides made from antibacterial peptides
Source: Royal Society of Chemistry journal article supplement (doi:10.1039/c3nr00225j), 2013-01-01
Supplement: c3nr00225j.pdf [file c3nr00225j.pdf]

## Stimuli-responsive self-assembling peptide made from antibacterial peptide

Yanfei Liu,<sup>†,‡</sup> Yanlian Yang,<sup>§</sup> Chen Wang<sup>§</sup> and Xiaojun Zhao<sup>\*,†,¶</sup>

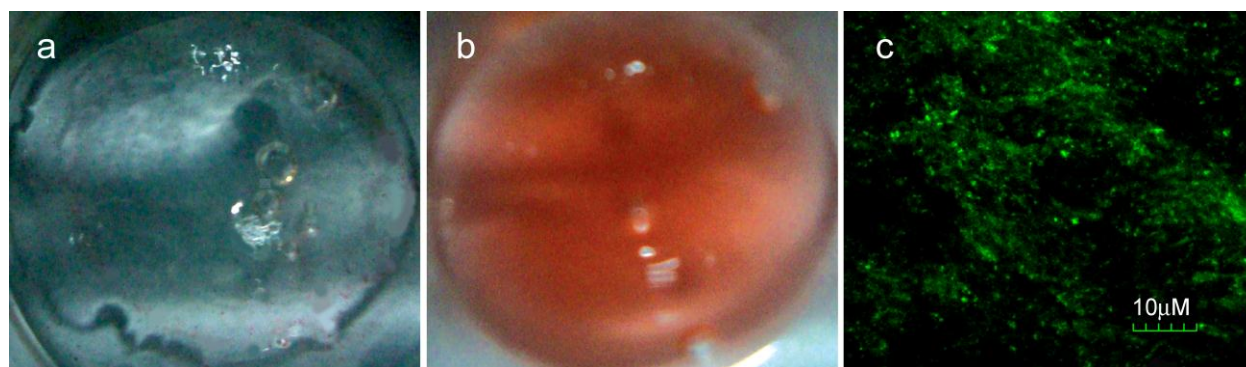

**Fig. S1** (a) Photographs of ASCP1 hydrogel at 10 mg/mL (pH 11, 25 mM borate) and (b) hydrogel stained by 200  $\mu$ M Congo red at RT. The staining solution was removed after 2 days and replaced with borate buffer (pH 11). (c) Confocal laser scanning photograph of Congo red stained ASCP1 hydrogel.

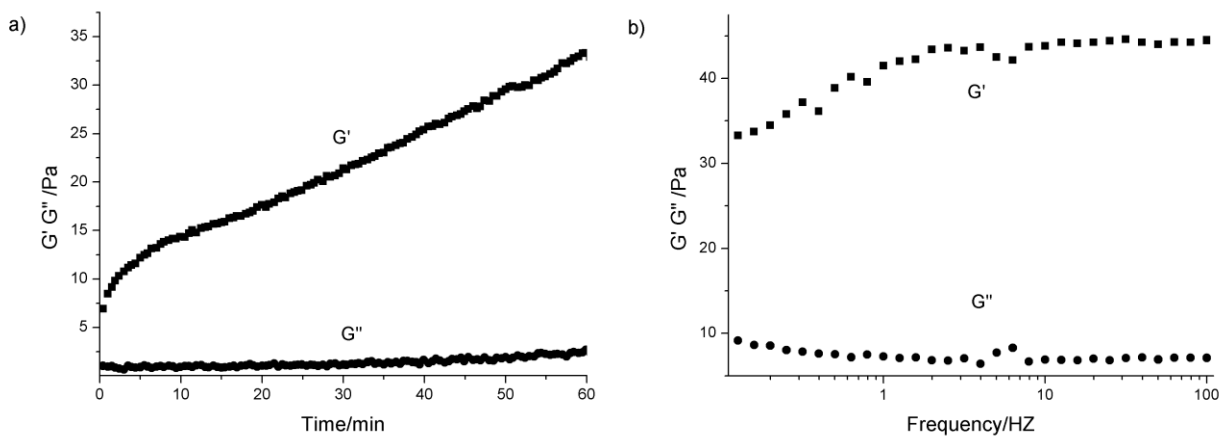

**Fig. S2** Rheology of the peptide ASCP1 hydrogel at 5 mg/mL (pH 11). (a) Hydrogel formation (0.5% strain, 1 Hz) monitored as a function of time by increase in storage modulus ( $G'$ ) and loss modulus ( $G''$ ) at 25 °C. (b) Frequency sweep (0.5% strain) of the hydrogel at 25 °C after 90 min of gelation.

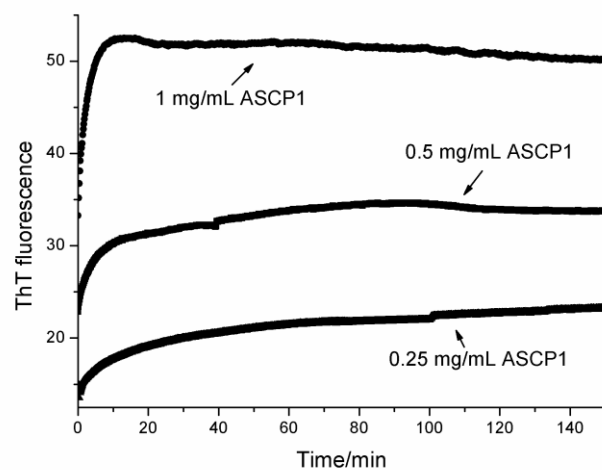

**Fig. S3** The fluorescence emission ( $\lambda_{\text{exc}}=440$  nm and  $\lambda_{\text{em}}=480$  nm) of 100  $\mu\text{M}$  ThT as a function of incubation time in buffer solutions of pH 11 with 1 mg/mL, 0.5 mg/mL and 0.25 mg/mL of ASCP1.

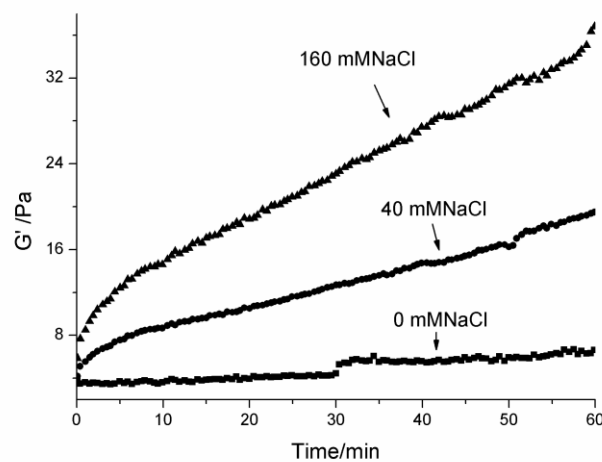

**Fig. S4** Dynamic time sweep (0.5% strain, 1Hz) of 5 mg/mL ASCP1, pH 9.0 solution with 0 mM, 40 mM and 160 mM NaCl at 25 °C.

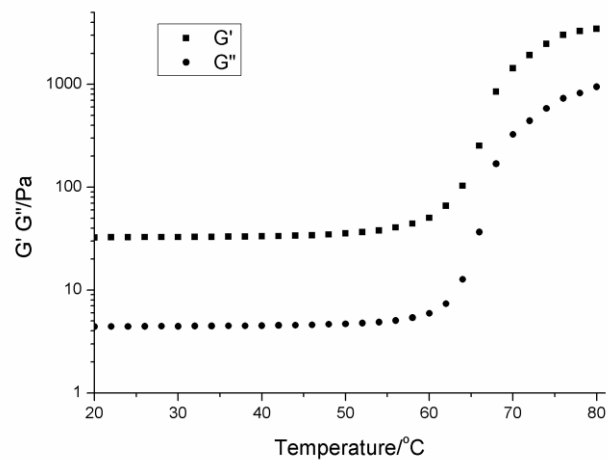

**Fig. S5** Temperature-dependency (0.5% strain, 1 Hz) of the storage modulus ( $G'$ ) and loss modulus ( $G''$ ) for 5 mg/mL ASCP1 hydrogel. The results show that the storage modulus increases quickly after heating to higher temperature ( $>60$  °C).
